# Supplementary material
Source: PubMed Central journal article supplement (PMC3664852)
Supplement: 0b25ddf56492d98eac60bf0e9d84b9a8_genetics.113.150326-8.pdf [file 0b25ddf56492d98eac60bf0e9d84b9a8_genetics.113.150326-8.pdf]

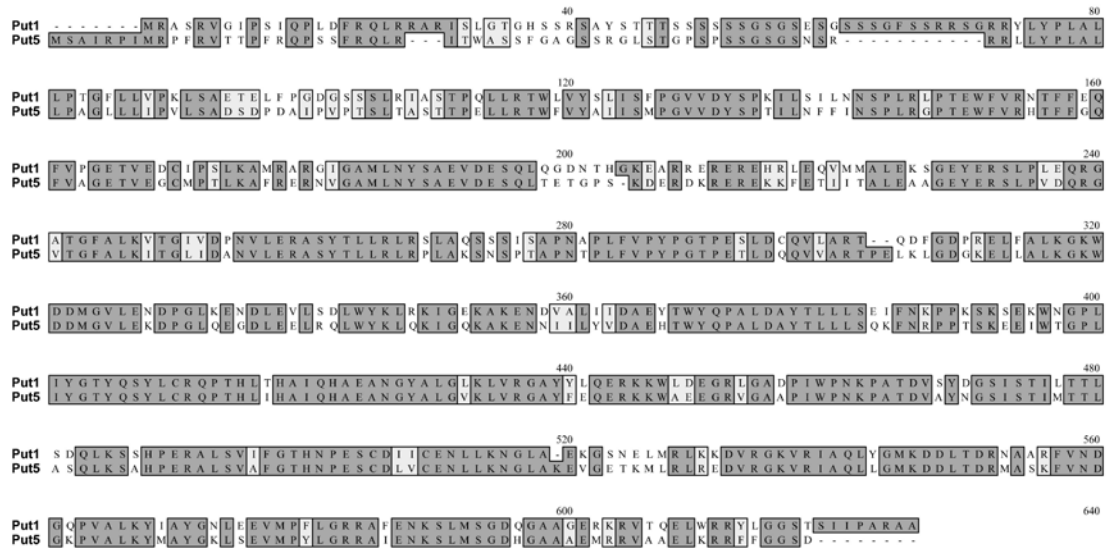

**Figure S2** ClustalW multiple sequence alignment of *C. neoformans* Put1 and Put5. Identical amino acid residues are shaded dark grey while similar residues are shaded light grey.
