# Supplementary material
Source: PubMed Central journal article supplement (PMC3664852)
Supplement: a1f103c8d2e32642aac0d206fea33b2c_genetics.113.150326-4.pdf [file a1f103c8d2e32642aac0d206fea33b2c_genetics.113.150326-4.pdf]

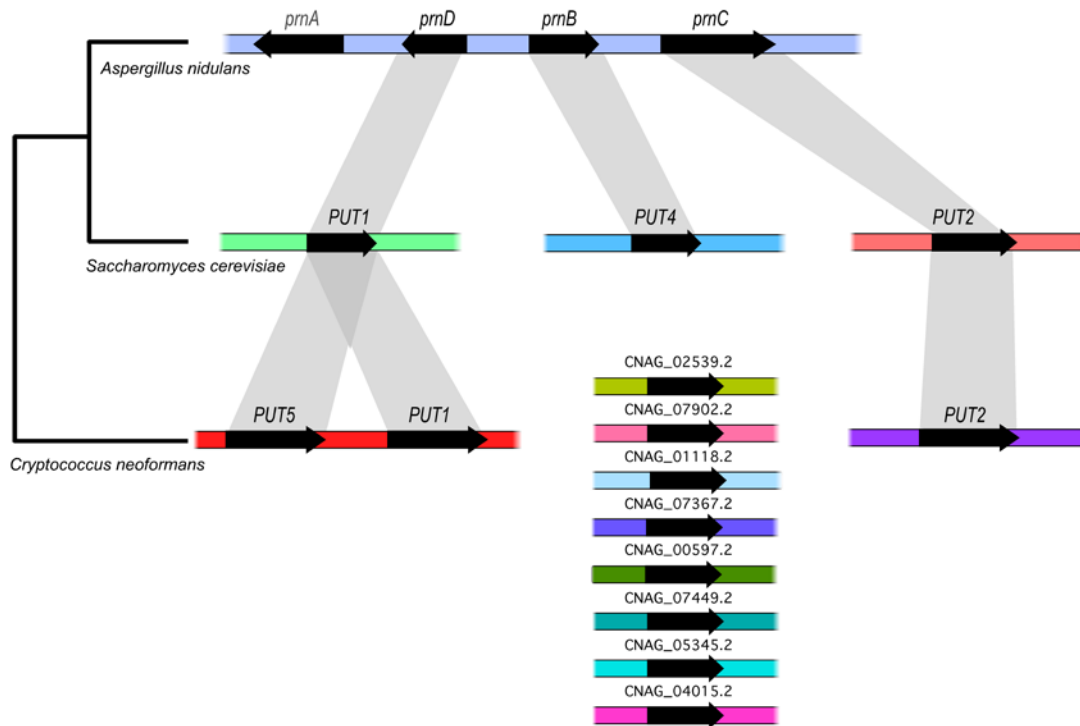

**Figure S1** The proline catabolism-associated genes are located in a cluster on a single chromosome in *A. nidulans*, however in *S. cerevisiae* and *C. neoformans*, the genes are unlinked and located on different chromosomes. *prnA* encodes the pathway-specific transcription factor of *prn* expression, *prnD*, *PUT1* and *PUT5* encode proline oxidase, *prnB* and *PUT4* encode the proline-specific permease, while *prnC* and *PUT2* encode P5C dehydrogenase. The multiple candidates of proline permease-encoding genes in *C. neoformans* are designated using the Broad Institute annotations.
