# Supplementary material
Source: PubMed Central journal article supplement (PMC3664852)
Supplement: c09f30a2d9dfb87abc5e4f70de203a55_genetics.113.150326-1.pdf [file c09f30a2d9dfb87abc5e4f70de203a55_genetics.113.150326-1.pdf]

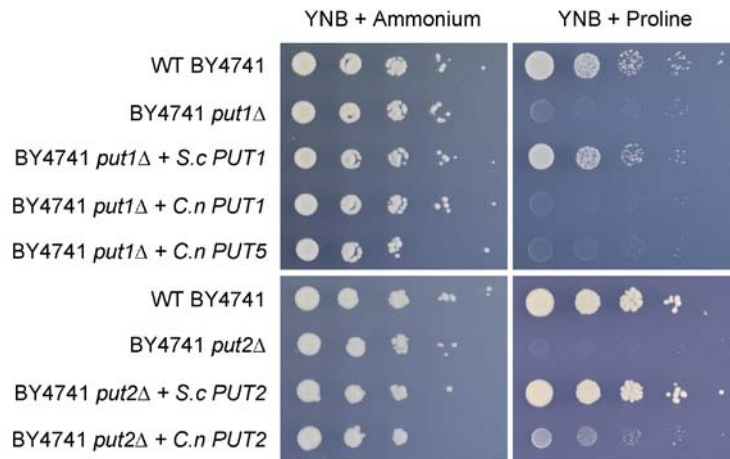

**Figure S3** Cross-species complementation using *C. neoformans* *PUT2* partially restored the proline utilization ability of the *S. cerevisiae* *put2*Δ mutant. Tenfold spot dilution assays for nitrogen source utilization showed that *C. neoformans* *PUT2* complemented the *S. cerevisiae* *put2*Δ mutant's proline assimilation defect, albeit to a poorer extent than an *S. cerevisiae* *PUT2*. On the other hand, neither *C. neoformans* *PUT1* or *PUT5* restored the proline utilization defect of the *S. cerevisiae* *put1*Δ strain.
