# Supplementary material
Source: PubMed Central journal article supplement (PMC3664852)
Supplement: d6094b6ad83f19a83b090fbdb6388449_genetics.113.150326-11.pdf [file d6094b6ad83f19a83b090fbdb6388449_genetics.113.150326-11.pdf]

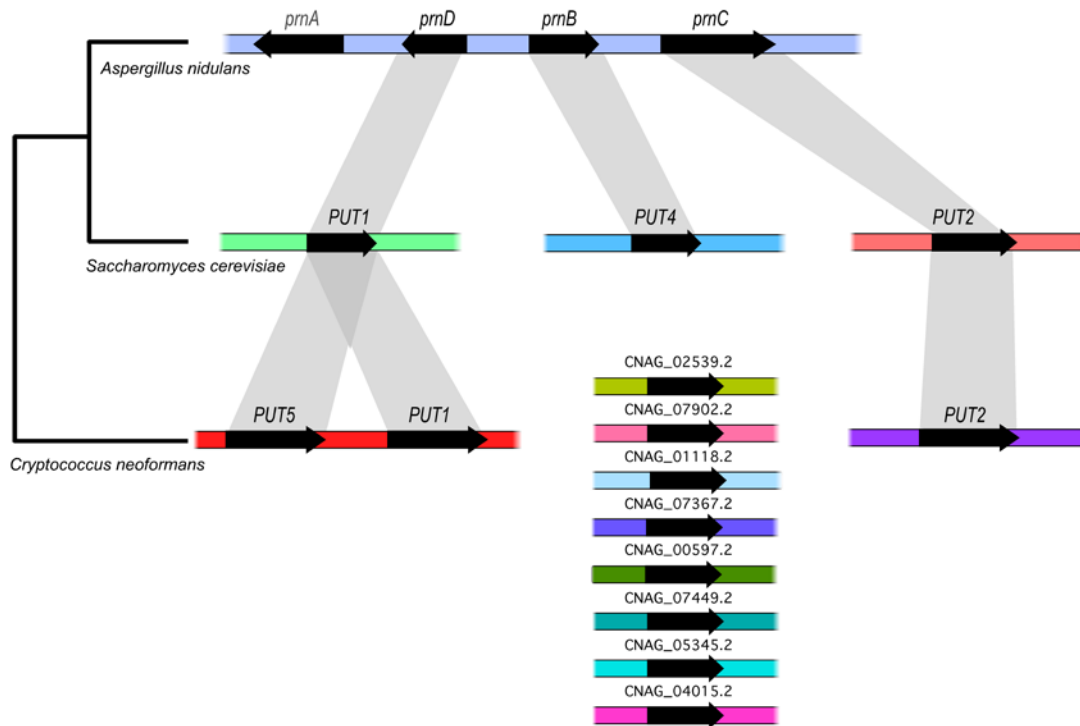

**Figure S1** The proline catabolism-associated genes are located in a cluster on a single chromosome in *A. nidulans*, however in *S. cerevisiae* and *C. neoformans*, the genes are unlinked and located on different chromosomes. *prnA* encodes the pathway-specific transcription factor of *prn* expression, *prnD*, *PUT1* and *PUT5* encode proline oxidase, *prnB* and *PUT4* encode the proline-specific permease, while *prnC* and *PUT2* encode P5C dehydrogenase. The multiple candidates of proline permease-encoding genes in *C. neoformans* are designated using the Broad Institute annotations.

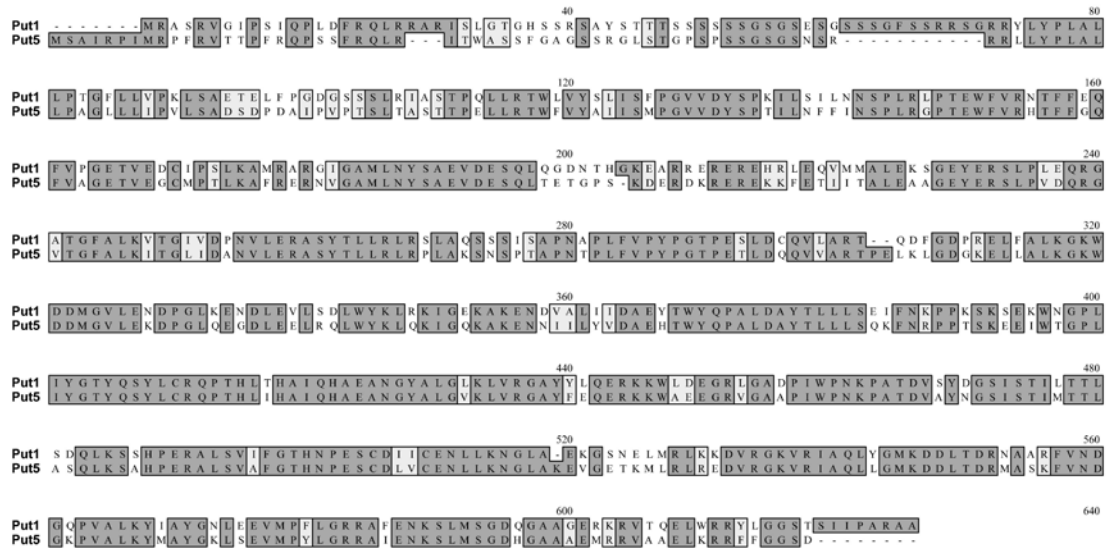

**Figure S2** ClustalW multiple sequence alignment of *C. neoformans* Put1 and Put5. Identical amino acid residues are shaded dark grey while similar residues are shaded light grey.

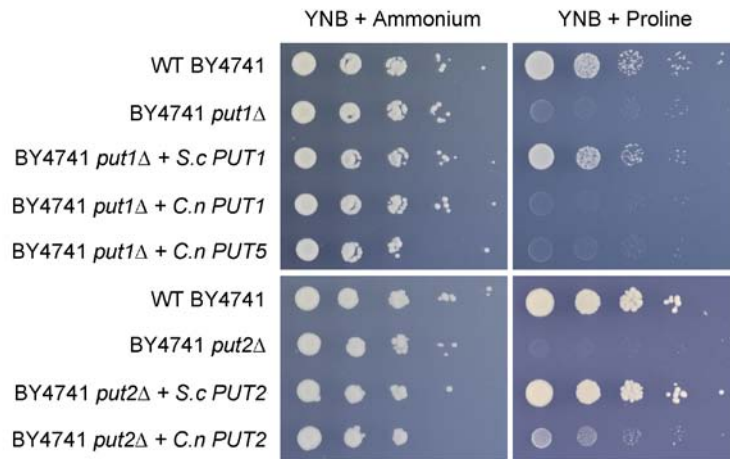

**Figure S3** Cross-species complementation using *C. neoformans* *PUT2* partially restored the proline utilization ability of the *S. cerevisiae* *put2*Δ mutant. Tenfold spot dilution assays for nitrogen source utilization showed that *C. neoformans* *PUT2* complemented the *S. cerevisiae* *put2*Δ mutant's proline assimilation defect, albeit to a poorer extent than an *S. cerevisiae* *PUT2*. On the other hand, neither *C. neoformans* *PUT1* or *PUT5* restored the proline utilization defect of the *S. cerevisiae* *put1*Δ strain.

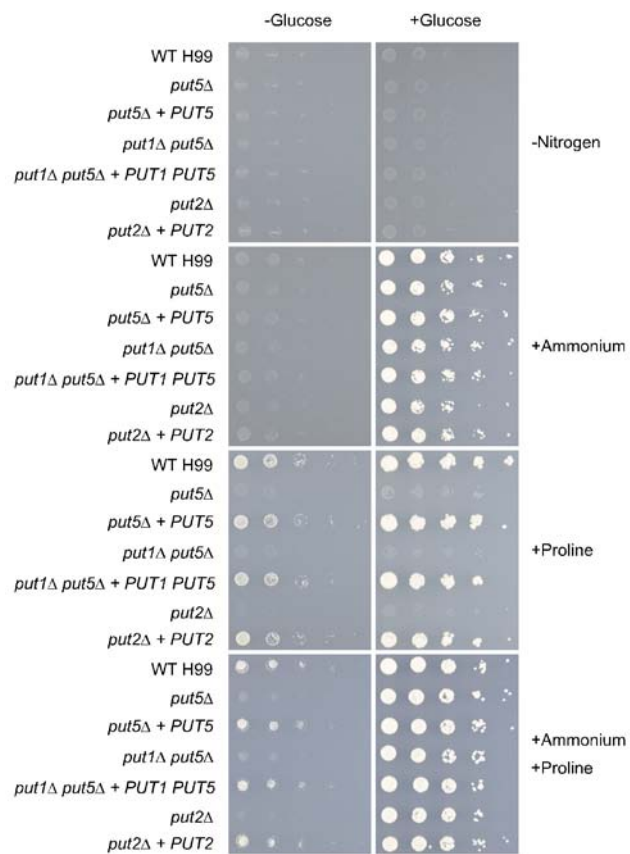

**Figure S4** Restoration of proline utilization ability upon the re-introduction of *PUT5*, *PUT1 PUT5* and *PUT2* into the *put5Δ*, double *put1Δ put5Δ* and *put2Δ* mutants, respectively. Tenfold spot dilution assays for nitrogen or nitrogen and carbon source utilization showed that the complemented *put5Δ + PUT5*, *put1Δ put5Δ + PUT1 PUT5* and *put2Δ + PUT2* strains exhibited wild-type growth on YNB supplemented with 10 mM proline (with or without 2% glucose as a carbon source).

### A Menadione stress assays

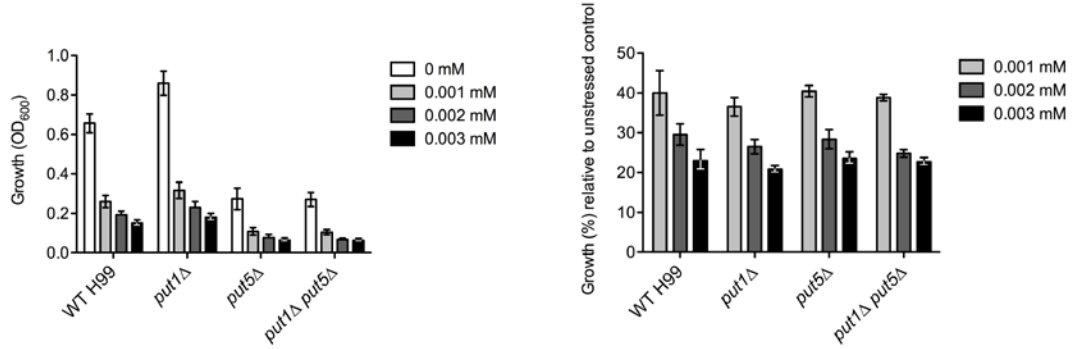

### B Sodium nitrite stress assays

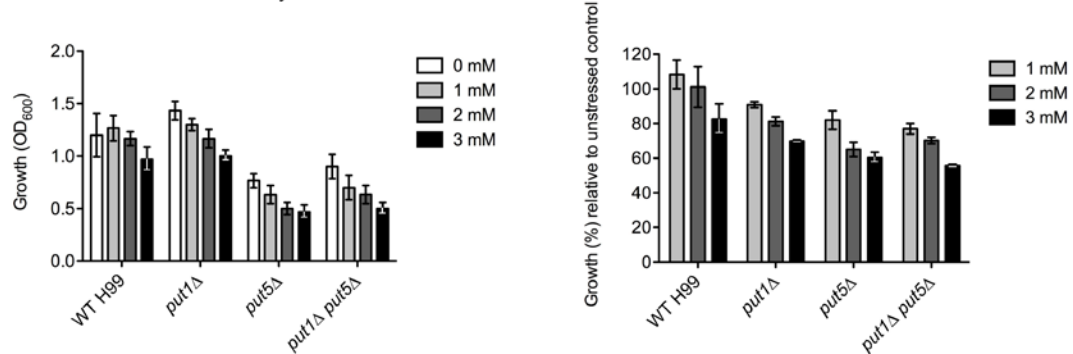

**Figure S5** Tolerance against the oxidative stressor menadione and nitrosative stressor sodium nitrite is equivalent between the wild-type and proline oxidase(s) deletion mutant strains. Wild-type H99, *put1Δ*, *put5Δ* and double *put1Δ put5Δ* strains were grown in YNB [proline and glutamate (10 mM each)] supplemented with (A) 0 – 0.003 mM menadione, or (B) 0 – 3 mM sodium nitrite. All strains displayed relatively similar growth percentage relative to the unstressed control when subjected to these individual stressors. Growth percentage relative to unstressed control is defined by dividing each stressed strain's growth in OD<sub>600</sub> with the same strain's growth in OD<sub>600</sub> when unstressed. Error bars represent standard errors across three biological replicates.

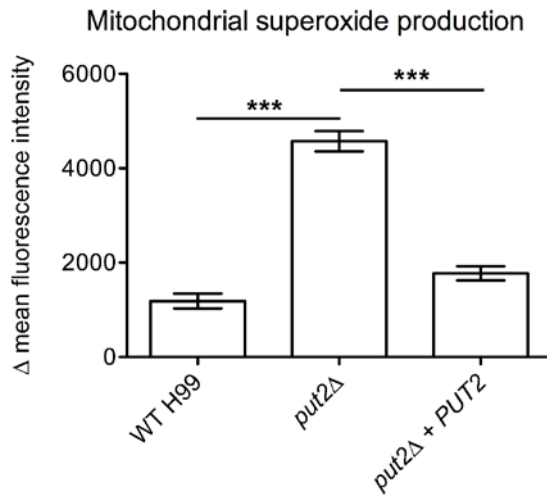

**Figure S6** Restoration of mitochondrial superoxide ions to wild-type levels upon the re-introduction of *PUT2* into the *put2Δ* mutant. Wild-type H99, *put2Δ* and complemented *put2Δ + PUT2* strains were briefly subjected to culture in YNB supplemented with 10 mM proline, stained with MitoSOX, and the accumulation of ROS in the mitochondria was assessed by flow cytometry. Bar chart presented as average  $\pm$  standard error of triplicate experiments showed that the *put2Δ* mutant had significantly enhanced  $\Delta$  mean fluorescence intensity ( $\Delta$  MFI) of oxidized MitoSOX relative to the wild-type or *put2Δ + PUT2* strains (\*\*\*) denotes  $P < 0.001$ ).  $\Delta$  MFI is defined by subtracting the background MFI (unstained cells) from the MFI generated from MitoSOX stained cells.

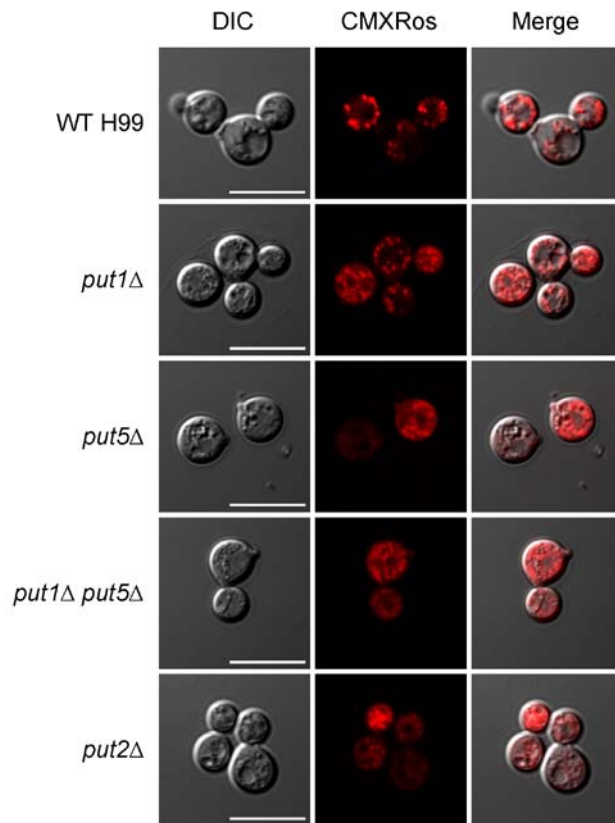

**Figure S7** None of the proline catabolic deletion mutants display a defect in mitochondrial membrane potential. Wild-type H99 and proline catabolic deletion mutant strains were briefly subjected to culture in YNB supplemented with 10 mM proline, stained with MitoTracker Red CMXRos, and cells viewed under a confocal microscope. The staining profile of the mutants was similar to that of wild-type showing accumulation of the fluorescence dye that is dependent on normal mitochondrial membrane permeability. Scale bar, 10  $\mu$ m.

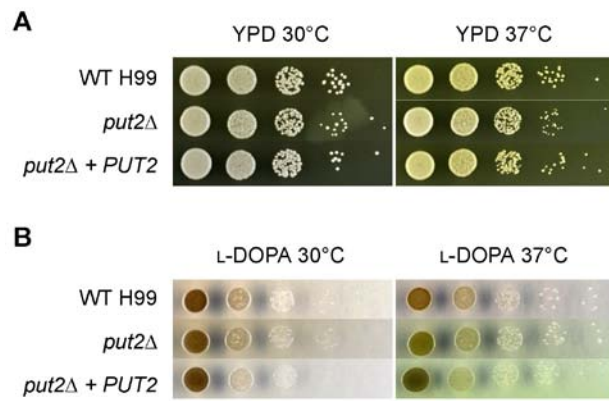

**Figure S8** Restoration of virulence factor expression to wild-type levels upon the re-introduction of *PUT2* into the *put2Δ* mutant. (A) Tenfold spot dilution assays on YPD medium demonstrated that the complemented *put2Δ + PUT2* strain exhibited wild-type growth at both 30 and 37°C. (B) Tenfold spot dilution assays on L-DOPA medium showed that the *put2Δ + PUT2* strain produced equal amount of melanin as the wild-type strain at both 30 and 37°C.



**Table S1 Fungal strains used in this study**

| <b>Strain</b> | <b>Genotype</b>                                                                                                                                          | <b>Original source</b> |
|---------------|----------------------------------------------------------------------------------------------------------------------------------------------------------|------------------------|
| H99           | <i>Cryptococcus neoformans</i> MAT $\alpha$                                                                                                              | John Perfect           |
| EL13          | H99 <i>put1::NEO</i>                                                                                                                                     | This study             |
| EL1           | H99 <i>put5::NEO</i>                                                                                                                                     | This study             |
| EL9           | H99 <i>put1 put5::NEO</i>                                                                                                                                | This study             |
| EL18          | H99 <i>put2::NEO</i>                                                                                                                                     | This study             |
| EL22          | H99 <i>put1::NEO + PUT1 NAT</i>                                                                                                                          | This study             |
| EL20          | H99 <i>put5::NEO + PUT5 NAT</i>                                                                                                                          | This study             |
| EL21          | H99 <i>put1 put5::NEO + PUT1 PUT5 NAT</i>                                                                                                                | This study             |
| EL23          | H99 <i>put2::NEO + PUT2 NAT</i>                                                                                                                          | This study             |
| BY4741        | <i>Saccharomyces cerevisiae</i> MAT $\alpha$ <i>his3<math>\Delta</math>1 leu2<math>\Delta</math>0 met15<math>\Delta</math>0 ura3<math>\Delta</math>0</i> | Carrie Brachmann       |
| 4099B7        | BY4741 <i>put1::KanMX</i>                                                                                                                                | Thermo Scientific      |
| 1000H4        | BY4741 <i>put2::KanMX</i>                                                                                                                                | Thermo Scientific      |

**Table S2 Primers used in this study**

| Primer | Purpose                                                       | Sequence (5'-3')                     |
|--------|---------------------------------------------------------------|--------------------------------------|
| UQ1070 | Cn <i>PUT1</i> qRT-PCR F                                      | AAAAGCTAAAGAGAACGACGTTGC             |
| UQ1071 | Cn <i>PUT1</i> qRT-PCR R                                      | TCTCACTCTTTGACTTTGGAGGTTT            |
| UQ1072 | Cn <i>PUT5</i> qRT-PCR F                                      | AGAAGGCTAAGGAGAACAACATCATT           |
| UQ1073 | Cn <i>PUT5</i> qRT-PCR R                                      | GTCCAGATCTCCTCCTTGGAAAG              |
| UQ1074 | Cn <i>PUT2</i> qRT-PCR F                                      | TCATTAACGGTGAGGAGGTCAAG              |
| UQ1075 | Cn <i>PUT2</i> qRT-PCR R                                      | GCAAGAGCACCGTCAATGG                  |
| UQ1300 | Cn <i>PUT1</i> deletion 5' F / genomic DNA generation F       | CTGCCATGTACAATCCATAAT                |
| UQ1301 | Cn <i>PUT1</i> deletion 5' R                                  | CTCTCCAGCTCACATCCTCGCAGCGGATTTCGTTA  |
| UQ1302 | Cn <i>PUT1</i> deletion 3' F                                  | TGTTAATACAGATAAACCCTTGGTTCAAGATACTTT |
| UQ1303 | Cn <i>PUT1</i> deletion 3' R / genomic DNA generation R       | TCTCTACATTACGCAACATGG                |
| UQ1304 | Cn <i>PUT1</i> deletion <i>NEO</i> F                          | TAACGAAATCGCGCTGCGAGGATGTGAGCTGGAGAG |
| UQ1305 | Cn <i>PUT1</i> deletion <i>NEO</i> R                          | AAAGTATCTTGAACCAACGGTTTATCTGTATTAACA |
| UQ1306 | Cn <i>PUT5</i> deletion 5' F / genomic DNA generation F       | GCACGCCTTCCGAAGTGAAAG                |
| UQ1307 | Cn <i>PUT5</i> deletion 5' R                                  | AGCTCACATCCTCGCAGCCGTTGTGGATCGTTGGTT |
| UQ1308 | Cn <i>PUT5</i> deletion 3' F                                  | TGTTAATACAGATAAACCACGCTTAAGTGGAGATG  |
| UQ1309 | Cn <i>PUT5</i> deletion 3' R / genomic DNA generation R       | CCTCGTTCGGCTAAAGCTGAC                |
| UQ1310 | Cn <i>PUT5</i> deletion <i>NEO</i> F                          | CAACCAACGATCCACAACGGCTGCGAGGATGTGAGC |
| UQ1311 | Cn <i>PUT5</i> deletion <i>NEO</i> R                          | CATCTCCACTTAAGCGTTGGTTTATCTGTATTAACA |
| UQ1312 | Cn <i>PUT2</i> deletion 5' F / genomic DNA generation F       | CTCCGGTGTCCATTATTCCCTA               |
| UQ1313 | Cn <i>PUT2</i> deletion 5' R                                  | AGCTCACATCCTCGCAGCTTTTGGTAAGGATGAAGA |
| UQ1314 | Cn <i>PUT2</i> deletion 3' F                                  | TGTTAATACAGATAAACCCTCAATGAGAATAGAAAA |
| UQ1315 | Cn <i>PUT2</i> deletion 3' R / genomic DNA generation R       | TTCTGACGGTGCAGGCGAAGA                |
| UQ1316 | Cn <i>PUT2</i> deletion <i>NEO</i> F                          | TCTTCATCCTTACCAAAAGCTGCGAGGATGTGAGCT |
| UQ1317 | Cn <i>PUT2</i> deletion <i>NEO</i> R                          | TTTCTATCTCATTGACGGTTTATCTGTATTAACA   |
| UQ1036 | Universal deletion diagnostic ( <i>NEO</i> marker specific) R | TGTGGATGCTGGCGGAGGATA                |
| UQ1410 | Cn <i>PUT1</i> deletion diagnostic F                          | AAACGCTTAAGTGGAGATGAA                |
| UQ1411 | Cn <i>PUT5</i> deletion diagnostic F                          | AGGCTGAAGATGATGCGAGAA                |
| UQ1412 | Cn <i>PUT2</i> deletion diagnostic F                          | CGATGACAGCCGATACCTACA                |
| UQ18   | Sequencing (M13F pCR2.1-TOPO)                                 | GTAAAACGACGGCCAG                     |
| UQ19   | Sequencing (M13R pCR2.1-TOPO)                                 | CAGGAAACAGCTATGAC                    |
| UQ1594 | Cn <i>PUT1</i> genomic DNA sequencing                         | GCTGTTCCGAAAGCTACCAGA                |
| UQ1595 | Cn <i>PUT1</i> genomic DNA sequencing                         | CCTCCTCGTCCTCTGGTTCT                 |
| UQ1596 | Cn <i>PUT1</i> genomic DNA sequencing                         | TGGCGTTGGAAAAGAGCGGAG                |
| UQ1597 | Cn <i>PUT1</i> genomic DNA sequencing                         | AAAGAGAACGAGTAGACACAT                |
| UQ1598 | Cn <i>PUT1</i> genomic DNA sequencing                         | GCGTCATTTTCGGTACTCACA                |
| UQ1599 | Cn <i>PUT1</i> genomic DNA sequencing                         | AACTTGATTCATTTCGTGCTC                |
| UQ1600 | Cn <i>PUT5</i> genomic DNA sequencing                         | TCCCCTGCTATTTTTTATCGT                |
| UQ1601 | Cn <i>PUT5</i> genomic DNA sequencing                         | GACAACCTCTTTTCGACAACC                |
| UQ1602 | Cn <i>PUT5</i> genomic DNA sequencing                         | TGAAACCGTGGAGGGATGTAT                |
| UQ1603 | Cn <i>PUT5</i> genomic DNA sequencing                         | GAAGGGCAAGTGGGATGACAT                |
| UQ1604 | Cn <i>PUT5</i> genomic DNA sequencing                         | CATACAACACGCCGAAGCCAA                |
| UQ1605 | Cn <i>PUT5</i> genomic DNA sequencing                         | GGCGGCAGAGATGAGGCGAGT                |
| UQ1606 | Cn <i>PUT2</i> genomic DNA sequencing                         | TGGGTGTTGAAGATTTGGTCTG               |

|         |                                                           |                                      |
|---------|-----------------------------------------------------------|--------------------------------------|
| UQ1607  | Cn <i>PUT2</i> genomic DNA sequencing                     | ACCAAAAATGTCTTCCCAACT                |
| UQ1608  | Cn <i>PUT2</i> genomic DNA sequencing                     | GCCGAAATCGACGCTGCCGCT                |
| UQ1609  | Cn <i>PUT2</i> genomic DNA sequencing                     | CCCAAAACCTCGACATCTACA                |
| UQ1610  | Cn <i>PUT2</i> genomic DNA sequencing                     | TACGCTTTTCATTTCCGGCCT                |
| UQ1611  | Cn <i>PUT2</i> genomic DNA sequencing                     | AGCGATTAGGGTTTACGACAT                |
| UQ1612  | Cn <i>PUT2</i> genomic DNA sequencing                     | AGAAGAAGAAGTCAGTCAGCA                |
| UQ270   | GenomeWalker adaptor                                      | GTAATACGACTCACTATAGGGC               |
| UQ271   | GenomeWalker nested adaptor                               | ACTATAGGGCACGCGTGGT                  |
| UQ272   | GenomeWalker 3' gene specific                             | CTGAATGGCGAATGAGCTTGAGCTTGG          |
| UQ273   | GenomeWalker 3' nested gene specific                      | ATCAGATTGTCGTTTCCCGCCTCAG            |
| UQ274   | GenomeWalker 5' gene specific                             | GAGAGGCGGTTTGCCTATTGGCTAGAG          |
| UQ275   | GenomeWalker 5' nested gene specific                      | ACGTCCGCAATGTGTATTAAAGTTGTC          |
| UQ1719  | Sc <i>PUT1</i> genomic DNA / promotor generation F        | AGACAAAACCTGAGCGAGACAG               |
| UQ1756  | Sc <i>PUT1</i> genomic DNA / terminator generation R      | GCACCTACACTAACAGCTTCT                |
| UQ1729  | Sc <i>PUT2</i> genomic DNA / promotor generation F        | TCACCGCATCGTTCAACTGTC                |
| UQ1760  | Sc <i>PUT2</i> genomic DNA / terminator generation R      | TGCAATGCCAAAAGTGTCTGT                |
| UQ1720  | Cn <i>PUT1</i> cDNA generation F                          | GGCATCCCATCCATACAACCTCTAGATTTTAGACA  |
| UQ1761  | Cn <i>PUT1</i> cDNA generation R                          | GACCAAAGTATCTTGAACCAA                |
| UQ1725  | Cn <i>PUT5</i> cDNA generation F                          | CACTAACGCACGCTAGAAAATGTCAGCAATCCGACC |
| UQ1762  | Cn <i>PUT5</i> cDNA generation R                          | TTAATCAGAGCCTCCAAAGAA                |
| UQ1730  | Cn <i>PUT2</i> cDNA generation F                          | AATTCACAGGAATGCTTTTCTTTCTTCATCCTTA   |
| UQ1763  | Cn <i>PUT2</i> cDNA generation R                          | GATACGAGACATTATGTATGA                |
| UQ1814  | Sc <i>PUT1</i> promotor generation R for Cn <i>PUT1</i>   | GCGGGAGGCACGCATTTCTAGCGTGCCTTAGTGT   |
| UQ1758  | Sc <i>PUT1</i> promotor generation R for Cn <i>PUT5</i>   | GGTCGGATTGCTGACATTTCTAGCGTGCCTTAGTG  |
| UQ1815  | Sc <i>PUT1</i> terminator generation F for Cn <i>PUT1</i> | CAAGATACTTTGGTCGAGGACTATAATATATACTC  |
| UQ1728  | Sc <i>PUT1</i> terminator generation F for Cn <i>PUT5</i> | AGATTCTTTGGAGGCTCTGATTAAGAGGACTATAA  |
| UQ1759  | Sc <i>PUT2</i> promotor generation R for Cn <i>PUT2</i>   | TAAGGATGAAGAAAAGAAAAGCAATTCTGTGAATT  |
| UQ1816  | Sc <i>PUT2</i> terminator generation F for Cn <i>PUT2</i> | ATGTCTCGTATCAAAAATTTTGTGGAATAGAACC   |
| UQ1770  | Sc <i>PUT1</i> genomic DNA sequencing                     | CAGCTATGACCATGATTACGC                |
| UQ1769  | Sc <i>PUT1</i> genomic DNA sequencing                     | GTCGCTACACACGTACATTGC                |
| UQ1818  | Sc <i>PUT1</i> genomic DNA sequencing                     | AGTGAAGGTGAAAGCGAGGCA                |
| UQ1771  | Sc <i>PUT1</i> genomic DNA sequencing                     | CGCCACTCATCAATGTTTTAT                |
| UQ1772  | Sc <i>PUT1</i> genomic DNA sequencing                     | TCCAAAAGCTCCTTATTAGTT                |
| UQ1819  | Sc <i>PUT1</i> genomic DNA sequencing                     | ACAACATCCTACTGCCCAATA                |
| UQ1773  | Sc <i>PUT1</i> genomic DNA sequencing                     | ATGAATATAAGCACCACGAAC                |
| UQ1774  | Sc <i>PUT1</i> genomic DNA sequencing                     | TCACCTGGTTGTCGCCTCTCA                |
| UQ1775  | Sc <i>PUT1</i> genomic DNA sequencing                     | AAGATTTCCGTTTGAAGTAGC                |
| UQ1776  | Sc <i>PUT2</i> genomic DNA sequencing                     | ATGACCATGATTACGCCAAGC                |
| UQ1777  | Sc <i>PUT2</i> genomic DNA sequencing                     | AAGATGGCAAGGGATATGTTT                |
| UQ1778  | Sc <i>PUT2</i> genomic DNA sequencing                     | CATATCCCTTGCCATCTTCAC                |
| UQ1820  | Sc <i>PUT2</i> genomic DNA sequencing                     | GACTTTCTCAGTAGGGGTAGA                |
| UQ1779  | Sc <i>PUT2</i> genomic DNA sequencing                     | AAACCTTCACAAACCGCTGCC                |
| UQ 1821 | Sc <i>PUT2</i> genomic DNA sequencing                     | CCATGGATAFACTTCTGGAGT                |
| UQ1780  | Sc <i>PUT2</i> genomic DNA sequencing                     | AGCCTTATCGTCGGTACCACT                |
| UQ1822  | Sc <i>PUT2</i> genomic DNA sequencing                     | GCCACTTTGTATTTTGCCATA                |
| UQ1781  | Sc <i>PUT2</i> genomic DNA sequencing                     | GGCGAGCAGTCCCTGACAAGA                |

|        |                                       |                       |
|--------|---------------------------------------|-----------------------|
| UQ1782 | Sc <i>PUT2</i> genomic DNA sequencing | TTCCACATGGCAAAGAATAAA |
| UQ1595 | Cn <i>PUT1</i> cDNA sequencing        | CCTCCTCGTCCTCTGGTTCT  |
| UQ1596 | Cn <i>PUT1</i> cDNA sequencing        | TGGCGTTGGAAAAGAGCGGAG |
| UQ1598 | Cn <i>PUT1</i> cDNA sequencing        | GCGTCATTTTCGGTACTCACA |
| UQ1601 | Cn <i>PUT5</i> cDNA sequencing        | GACAACTCCTTTTCGACAACC |
| UQ1602 | Cn <i>PUT5</i> cDNA sequencing        | TGAAACCGTGGAGGGATGTAT |
| UQ1603 | Cn <i>PUT5</i> cDNA sequencing        | GAAGGGCAAGTGGGATGACAT |
| UQ1604 | Cn <i>PUT5</i> cDNA sequencing        | CATACAACACGCCGAAGCCAA |
| UQ1605 | Cn <i>PUT5</i> cDNA sequencing        | GGCGGCAGAGATGAGGCGAGT |
| UQ1607 | Cn <i>PUT2</i> cDNA sequencing        | ACCAAAAATGTCTTCCCAACT |
| UQ1608 | Cn <i>PUT2</i> cDNA sequencing        | GCCGAAATCGACGCTGCCGCT |
| UQ1609 | Cn <i>PUT2</i> cDNA sequencing        | CCCAAAACCTCGACATCTACA |
| UQ1611 | Cn <i>PUT2</i> cDNA sequencing        | AGCGATTAGGGTTTACGACAT |

**Table S3 Plasmids used in this study**

| Plasmid   | Detail                                                                                    | Original source |
|-----------|-------------------------------------------------------------------------------------------|-----------------|
| pJAF1     | <i>NEO</i> selectable marker in pCR2.1-TOPO                                               | James Fraser    |
| pCH233    | <i>NAT</i> selectable marker in pCR2.1-TOPO                                               | Christina Hull  |
| pELYL1    | H99 <i>PUT1</i> genomic DNA including promotor and terminator in pCR2.1-TOPO              | This study      |
| pELYL2    | H99 <i>PUT5</i> genomic DNA including promotor and terminator in pCR2.1-TOPO              | This study      |
| pELYL4    | H99 <i>PUT1 PUT5</i> genomic DNA including promotor and terminator in pCR2.1-TOPO         | This study      |
| pELYL3    | H99 <i>PUT2</i> genomic DNA including promotor and terminator in pCR2.1-TOPO              | This study      |
| pELYL5    | H99 <i>PUT1</i> genomic DNA including promotor and terminator in pCH233                   | This study      |
| pELYL6    | H99 <i>PUT5</i> genomic DNA including promotor and terminator in pCH233                   | This study      |
| pELYL8    | H99 <i>PUT1 PUT5</i> genomic DNA including promotor and terminator in pCH233              | This study      |
| pELYL7    | H99 <i>PUT2</i> genomic DNA including promotor and terminator in pCH233                   | This study      |
| YCplac111 | YC-type (centromeric) shuttle vector with <i>LEU2</i> and <i>ampR</i> markers             | Daniel Gietz    |
| pEWC38    | H99 <i>PUT1</i> cDNA in pCR2.1-TOPO                                                       | This study      |
| pEWC39    | H99 <i>PUT5</i> cDNA in pCR2.1-TOPO                                                       | This study      |
| pEWC37    | H99 <i>PUT2</i> cDNA in pCR2.1-TOPO                                                       | This study      |
| pEWC45    | H99 <i>PUT1</i> cDNA flanked by BY4741 <i>PUT1</i> promotor and terminator in pCR2.1-TOPO | This study      |
| pEWC46    | H99 <i>PUT5</i> cDNA flanked by BY4741 <i>PUT1</i> promotor and terminator in pCR2.1-TOPO | This study      |
| pEWC40    | H99 <i>PUT2</i> cDNA flanked by BY4741 <i>PUT2</i> promotor and terminator in pCR2.1-TOPO | This study      |
| pEWC35    | BY4741 <i>PUT1</i> genomic DNA including promotor and terminator in pCR2.1-TOPO           | This study      |
| pEWC36    | BY4741 <i>PUT2</i> genomic DNA including promotor and terminator in pCR2.1-TOPO           | This study      |
| pEWC48    | H99 <i>PUT1</i> cDNA flanked by BY4741 <i>PUT1</i> promotor and terminator in YCplac111   | This study      |
| pEWC49    | H99 <i>PUT5</i> cDNA flanked by BY4741 <i>PUT1</i> promotor and terminator in YCplac111   | This study      |
| pEWC47    | H99 <i>PUT2</i> cDNA flanked by BY4741 <i>PUT2</i> promotor and terminator in YCplac111   | This study      |
| pEWC50    | BY4741 <i>PUT1</i> genomic DNA including promotor and terminator in YCplac111             | This study      |
| pEWC51    | BY4741 <i>PUT2</i> genomic DNA including promotor and terminator in YCplac111             | This study      |
